# Supplementary material for: Antibacterial and Sporicidal Activity Evaluation of Theaflavin-3,3′-digallate
Source: MDPI journal article supplement (doi:10.3390/ijms23042153), 2022-02-15
Supplement: s1 [file s1]

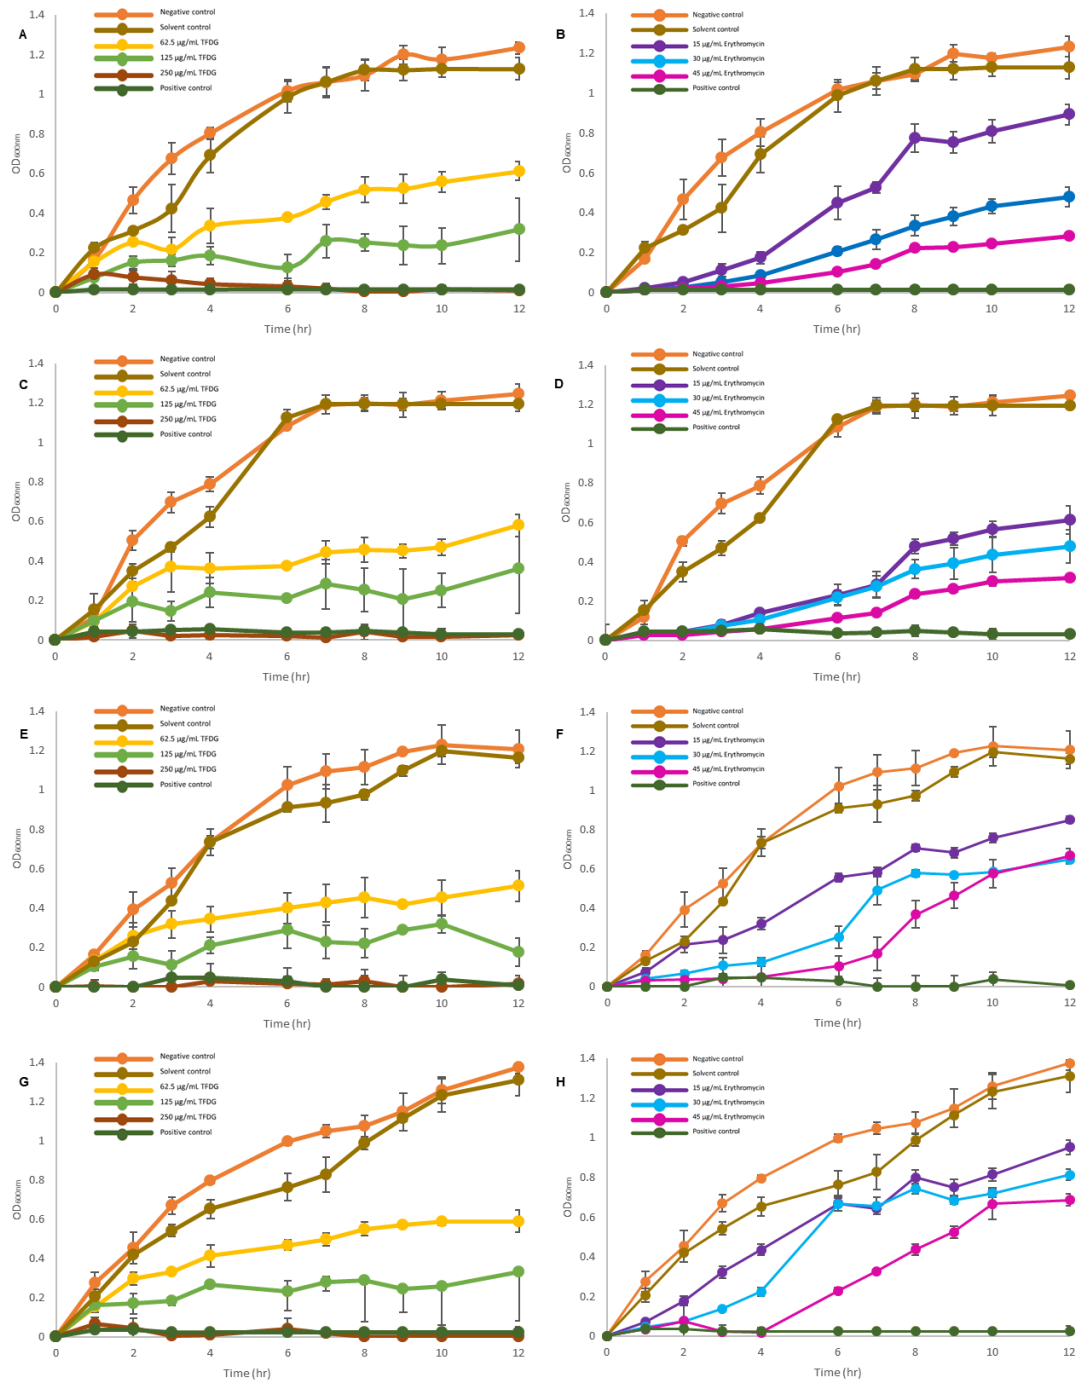

**Figure S1.** Growth analysis of Gram-negative species with various concentrations of TFDG and erythromycin. The orange is negative control (broth), light brown is solvent control (1% EtOH), yellow is 62.5  $\mu\text{g/mL}$  TFDG, light green is 125  $\mu\text{g/mL}$  TFDG, dark brown is 250  $\mu\text{g/mL}$  TFDG, dark green is positive control (10% bleach), purple is 15  $\mu\text{g/mL}$  erythromycin, light blue is 30  $\mu\text{g/mL}$  erythromycin and pink is 45  $\mu\text{g/mL}$  erythromycin (A-B) *K. aerogenes*, (C-D) *E. coli*, (E-F) *P. aeruginosa*, (G-H) *P. mirabilis*.

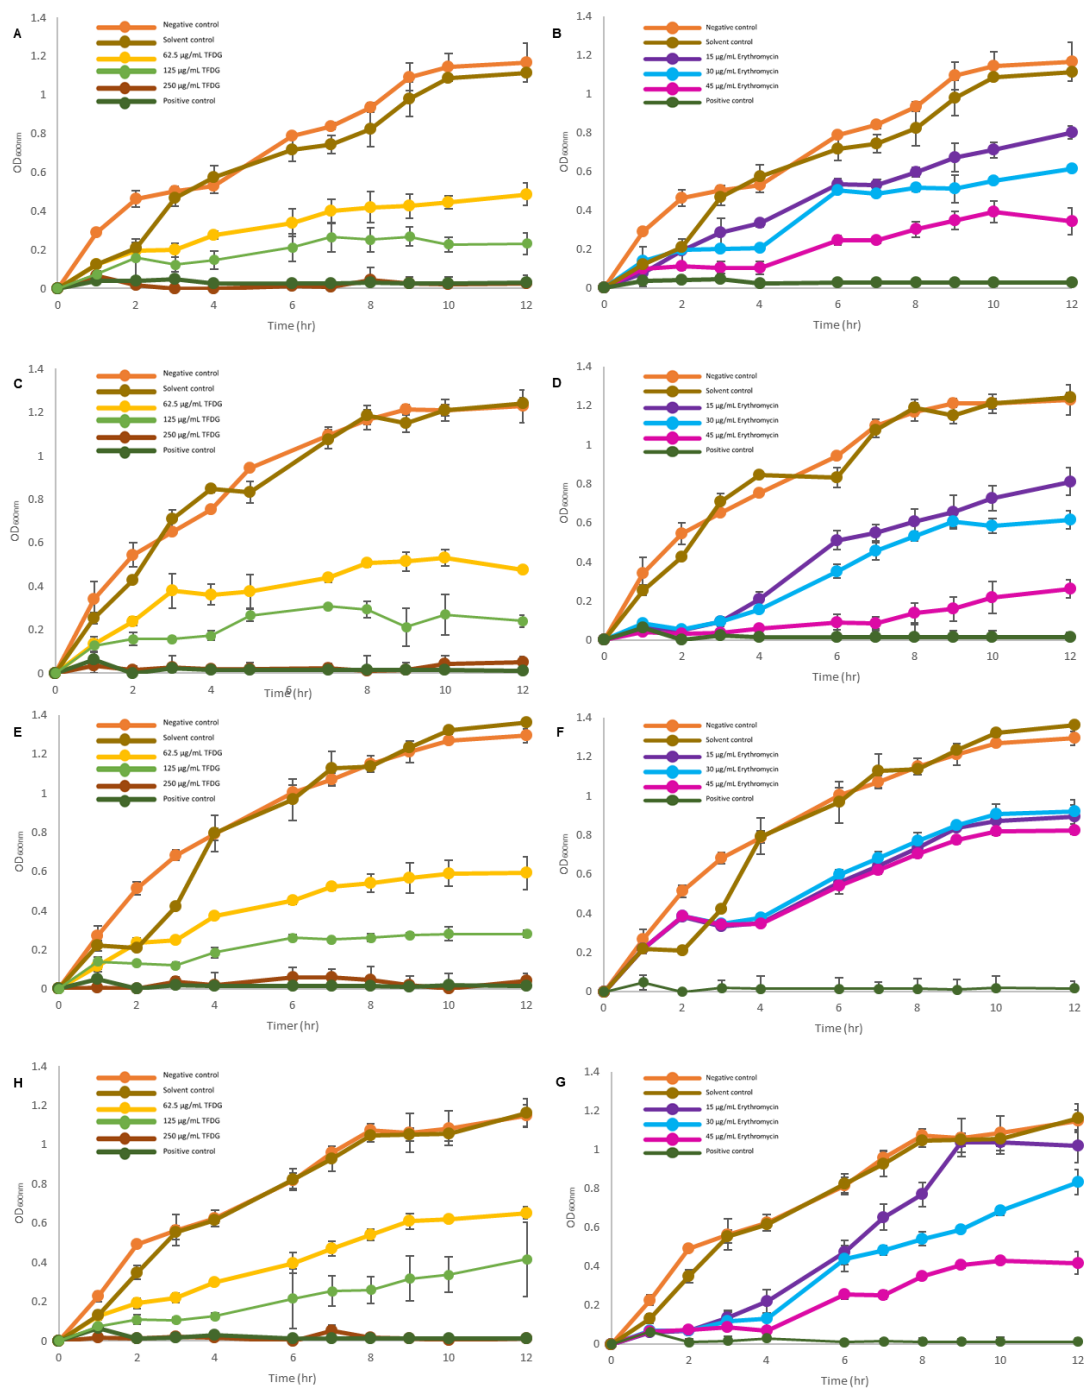

**Figure S2.** Growth analysis of Gram-positive species with various concentrations of TFDG and erythromycin. The orange is negative control (broth), light brown is solvent control (1% EtOH), yellow is 62.5  $\mu\text{g/mL}$  TFDG, light green is 125  $\mu\text{g/mL}$  TFDG, dark brown is 250  $\mu\text{g/mL}$  TFDG, dark green is positive control (10% bleach), purple is 15  $\mu\text{g/mL}$  erythromycin, light blue is 45  $\mu\text{g/mL}$  erythromycin and pink is 45  $\mu\text{g/mL}$  erythromycin (A-B) *B. cereus*, (C-D) *B. subtilis*, (E-F) *S. aureus*, (G-H) *S. pyogenes*.

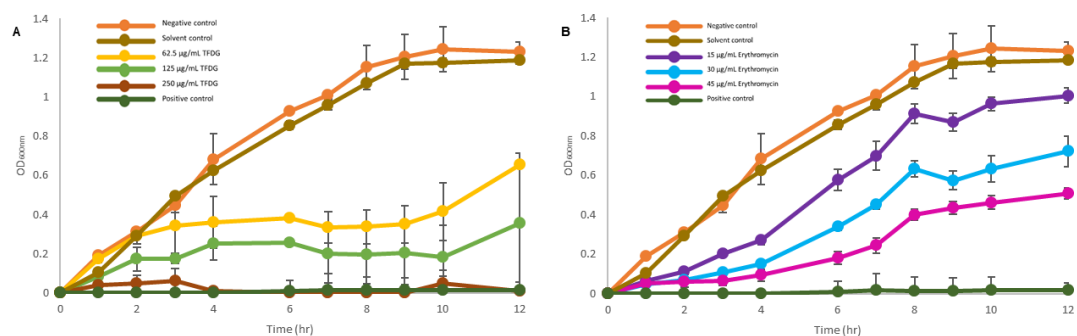

**Figure S3.** Growth analysis of acid-fast species with various concentrations of TFDG and erythromycin. The orange is negative control (broth), light brown is solvent control (1% EtOH), yellow is 62.5 µg/mL TFDG, light green is 125 µg/mL TFDG, dark brown is 250 µg/mL TFDG, dark green is positive control (10% bleach), purple is 15 µg/mL erythromycin, light blue is 30 µg/mL erythromycin and pink is 45 µg/mL erythromycin (A-B) *M. smegmatis*.
